# Supplementary material
Source: Research Square preprint supplement (doi:10.21203/rs.3.rs-8851329/v1)
Supplement: Supplementary file 1 [file c7608ed695a960c2b7f8da3b.docx]

(TITLE (intervention* or programme* or effectiveness* or impact* or "systematic review*" or "synthesis" or "scoping review*" or "review*" or "provision" or "initiative*" or "evaluation*" or "randomised" or "randomized" or "trial*" or "experiment* stud*" or "cohort stud*" or "longitudinal stud*")) AND (((TITLE ("ill health" or "illness" or "sickness" or "disabilit*" or "disabled" or "mental health" or "sick" or "health" or "wellbeing" or "well-being" ) AND PUBYEAR > 2009 AND PUBYEAR < 2024)) AND (TITLE ("employment" or "market participation" or "economic inactivity" or "economic activity" or "job retention" or "job security" or "flexible work*" OR "job support" OR "job search*" OR "financial incentive*" or "return to work" or "work support" or "flexible work*" or "extended work*" or "upskill*" or "reskill*" or “workplace”)))

(TITLE (intervention* or programme* or "effectiveness" or "impact" or "systematic review*" or "synthesis" or "scoping review*" or "review*" or "provision" or "initiative*" or "evaluation*" or "randomised" or "randomized" or "trial*" or "experiment* stud*" or "cohort stud*" or "longitudinal stud*")) AND (((TITLE-ABS-KEY("older work*" or "older employ*" or "aging work*" or "ageing work*" or "aging employ*" or "ageing employ*" or "older people" or "older population*" or "elderly" or "elder* work*" or "elder* employ*") AND PUBYEAR > 2009 AND PUBYEAR < 2024)) AND (TITLE ("employment" or "market participation" or "economic inactivity" or "economic activity" or "job retention" or "job security" or "flexible work*" OR "job support" OR "job search*" OR "financial incentive*" or "return to work" or "work support" or "flexible work*" or "extended work*" or "upskill*" or "reskill*" or "workplace")))

Grey literature sources

#### Websites

- The World Bank (<http://www.worldbank.org/>)
- Institute of Development Studies <http://www.ids.ac.uk/>
- Centre of economic performance <https://cep.lse.ac.uk/_NEW/publications/abstract.asp?index=10314>
- Learn and work <https://learningandwork.org.uk/resources/research-and-reports/missing-workers/>
- Scottish Government <https://www.gov.scot/publications/economic-inactivity-young-people-aged-16-24-definition-reasons-potential-future-focus/pages/4/>
- Institute of Fiscal studies <https://ifs.org.uk/sites/default/files/output_url_files/BN345-the-rise-of-economic-inactivity-in-people-50s-60s.pdf>

Table 1. Inclusion criteria

| **Participant**s: Older workers | Studies reported data on populations of older workers (aged 50 and older).  Many labour market and ageing studies explicitly treat workers aged 50 and above as “older workers,” particularly when examining extended working lives, retention, or late‑career transitions.​  Reviews of the labour market for older people and UK skills policy routinely use 50+ to demarcate a group whose employment trajectories and risks begin to diverge from “prime‑age” workers. |
| --- | --- |
| **Intervention** | We include any type of intervention that aims to address economic inactivity or unemployment including but not limited to universal support, outreach, workplace, return to work, health interventions, financial incentives, laws and regulations. |
| **Comparator** | Studies will be included if the outcome measures include a comparator, this includes  Employment status:   - - Employment rate (in work vs not in work).   - Retirement/exit from the workforce (retired vs still employed).   - Receipt of different benefits: disability benefit, pension, unemployment benefit.​   Health‑related work outcomes:   - - Sickness absence days (including short spells of 1–3 days vs longer spells of 21+ days).   - Work ability and vitality.   - Depression, pain, fatigue, physical function.​   Participation and engagement:   - - Intervention vs non‑participants or comparison/control groups (e.g. no intervention, pre‑reform vs post‑reform).   - High compliers vs low/non‑compliers within an intervention (e.g. high yoga attendance vs others).​   Other person‑centred comparators:   - - Self‑belief, intentions, work attitudes, self‑efficacy. |
| **Outcomes** | We include studies that report at least one labour market–related outcome, defined as any quantitative measure reflecting an individual’s participation, performance, or status within the labour market. This encompasses, but is not limited to, indicators such as return to work or job retention after illness or intervention, work absence, employment or unemployment status, employment rate, type or quality of employment (e.g., full-time, part-time, informal work), income or earnings, and changes in working hours or productivity. Studies reporting intermediate or proxy indicators (such as employability, job-seeking behaviour, or perceived work readiness) are also eligible if they are explicitly linked to labour market participation. |
| **Study design** | We include primary evaluation studies employing either retrospective or prospective designs, encompassing both experimental and quasi-experimental methodologies. Eligible studies are those that assess the effect or impact of an intervention, exposure, or policy on relevant outcomes through systematic data collection and analysis. This includes randomised controlled trials (RCTs), cluster-randomised trials, and natural or field experiments, as well as quasi-experimental designs such as difference-in-differences, interrupted time series, propensity score–matched analyses, and regression discontinuity designs. Non-experimental observational studies (e.g., cross-sectional, purely descriptive, or qualitative assessments without a clear evaluative or causal component) are excluded unless they form part of a mixed-methods evaluation with a defined quantitative evaluation component. |
| **Language** | Studiers are included if they were published in English due to resource and time constraints of a rapid review. |
| **Date** | Published on or after 2010. Studies published before 2010 were excluded because they relate to a substantially different policy and labour‑market environment (e.g. different pension ages, retirement norms and anti‑discrimination regimes), limiting their applicability to current conditions. |

Table 2: Primary studies. Structural and system wide level interventions

| Title | Study characteristics | Interventions characteristics | Findings |
| --- | --- | --- | --- |
| Ardito (2021) | **Country**  Italy    **Population**  Older workers (in employment)  Other key    Private sector, males   **Type of study design**  Quasi experimental methods, administrative data, pre and post pension reform    **Level of intervention**  Individual level    **Delivery setting**  Not stated    **Comparison**  Pre reform | **Structural and system interventions**  Raising retirement age    **Level of intervention**  Individual level    **Key intervention strategies and approaches used**      Raising the normal retirement age (NRA) from 60 years to 65 years for private-sector male employees. | **Employment related outcomes**  Employment rate    **Receipt of benefits**  Disability benefit  Pension benefit  Unemployment benefit    **Findings**  Mixed  Findings summary    the NRA raise reduces pension benefit claims but does not lead to a one-to-one increase in the employment rate since workers also apply for more disability and unemployment benefits. This paper shows that raising the NRA could have unintended effects as it affects more negatively the most vulnerable in the labour market. |
| Dejemeppe (2015) | **Country**  Belgium    **Population**  Older workers (in employment)    **Type of study design**  Observational study    **Level of intervention**  Government level (local or national)    **Delivery setting**  Structural and systems (e.g. law, tax, social security)    **Comparison**  Pre reform | **Structural and system interventions**   Intergenerational Solidarity Pact (ISP)    aims to discourage access to early retirement    **Level of intervention**  Government level (local or national)    **Key intervention strategies and approaches used**       pension bonus, reductions in employers’ social security contributions and measures discouraging early retirement while encouraging working time reductions at the end of the career. | **Employment related outcomes**  Employment rate    **Findings**  Mixed  Findings Summary    The results suggest a slight positive impact of the ISP on the employment rate of older workers but to the detriment of the younger workers. |
| Kondo (2017) | **Country**  Japan    **Population**  Older workers (in employment)    in large sized firms    **Type of study design**  Quasi experimental methods    natural experiment - not researcher-controlled    **Level of intervention**  Government level (local or national)    raising age for eligibility for state pension revision Elderly Employment Stabilization Law (EESL)    **Delivery setting**  Structural and systems (e.g. law, tax, social security) | **Structural and system interventions**   Raising retirement age    **Level of intervention**  Government level (local or national)    raising age for eligibility for state pension revision Elderly Employment Stabilization Law (EESL)    **Key intervention strategies and approaches used**       End of setting mandatory retirement lower than pension eligibility age    Raising age for eligibility for state pension revision. employers had to offer continuous employment until age 63 | **Employment related outcomes**  Exit from labour market    **Findings**  Positive  Findings summary    study finds that the EESL revision increased the employment rate of men in their early 60s among the affected cohorts. The effect was limited to employees at large-sized firms, consistent with the view that the EESL was binding only for large-sized firms. These results imply that government intervention on the demand-side can be effective in increasing employment only for large-sized firms. the effect of an increase in the pension eligibility age is larger for the cohorts subject to the revised EESL. This result implies that demand-side interventions, such as the EESL revision, can potentially make conventional supply-side interventions, such as raising the pension eligibility age, more effective. |
| Komada (2019) | **Country**  Poland    **Population**  Older adults  Other key characteristics    in a transition economy that had previously encouraged early retirement    **Type of study design**  Observational study    **Level of intervention**  Government level (local or national)    **Delivery setting**  Structural and systems (e.g. law, tax, social security)    **Comparison**  Pre reform | **Structural and system interventions**   Raising retirement age    **Level of intervention**  Government level (local or national)    **Key intervention strategies and approaches used**       in the mid-2000s nearly everybody was entitled to claim benefits as early as 55/60 and in some occupations it was even 50/55. This situation changed with a bill passed in December 2008 and effective as of January 2009. Minimum eligibility age of 60/65 was restored universally, with full eligibility requiring 25 years of work experience. | **Employment related outcomes**  Exit from labour market    **Receipt of benefits**  Pension benefit    **Findings**  Small effect  Findings summary    study finds virtually no effects for the early pension benefit take-up rates, which suggests that even prior to the reform, the eligibility alone was not the only criterion for the decision to claim early pension benefits .. results effectively imply is that a large fraction of individuals who remained active in the labour market following the introduction of the reform, would have done so also in the absence of the legislative changes. |
| Le Duigou (2021) | **Country**  France    **Population**  Older workers (in employment)    **Type of study design**  Observational study    **Level of intervention**  Workplace and employer level  Government level (local or national)    **Delivery setting**  Structural and systems (e.g. law, tax, social security)    **Comparison**  Pre reform | **Structural and system interventions**   Incentives to delay retirement    **Level of intervention**  Workplace and employer level  Government level (local or national)    **Key intervention strategies and approaches used**       Pension bonus to older workers who postponed their retirement until the legal age. Higher wages to induce their workers to work longer. | **Employment related outcomes**  Employment rate  Wages    **Findings**  Mixed  Findings summary    Postponing workers’ retirement horizon with an incentive policy affects wages in the previous age class and particularly for earners at the top of the wage distribution, but it does not influence employment. Financial incentives also do not affect workers homogeneously; disutility at work and unemployment insurance cause only highly paid workers to lengthen their career. The main effect of incentive policies is a distortion of the offered wage distribution, such that the policy only benefits insiders already employed with a high wage. |
| Lopez-Novella (2012) | **Country**  Belgium    **Population**  Older workers (in employment)    **Type of study design**  Observational study    **Delivery setting**  Structural and systems (e.g. law, tax, social security)    **Comparison**  Pre reform | **Structural and system interventions**   Incentives to delay retirement    **Key intervention strategies and approaches used**  A pensionbonus ifretirement delayed | **Employment related outcomes**  Continued employment    **Findings**  No effect  Findings summary    the “pension bonus” had, if any, a very limited impact on the probability of staying employed a year later for male workers aged 62-64 compared to those aged 60-61. |
| Smith (2014) | **Country**  Belgium    **Type of study design**  Observational study    **Level of intervention**  Government level (local or national)    **Delivery setting**  Structural and systems (e.g. law, tax, social security)    **Comparison**  Pre reform | **Structural and system interventions**   Intergenerational Solidarity Pact (ISP)    **Level of intervention**  Government level (local or national)    **Key intervention strategies and approaches used**       The objective of the Intergenerational Solidarity Pact (ISP) was to increase the employment rate of elderly people. The main policies consist in, by order of importance, a permanent wage subsidy, an easy access to working time reduction with wage compensation and a pension bonus. | **Employment related outcomes**  Employment rate    **Findings**  Mixed  Findings summary  The point estimates suggest that there could be a small positive impact of the ISP on the employment rate of elderly men and, on a smaller scale, of elderly women. Consistent with this finding, the results suggest a small negative impact for younger men which could be interpreted as a substitution effect. However, the observed values of the employment rate stay in the confidence interval around the forecasts for the period 2007q2-2008q2 which means that there is not enough statistical power to conclude to a significant impact of the ISP. For younger women, there is no evidence of an impact of the ISP |
| Yuan (2022) | **Country**  China    **Population**  Older workers (in employment)  Other key characteristics as stated in the paper (e.g. low income, rural, migrants)    rural and urban health insurance schemes, weak coverage for informal workers    **Type of study design**  Observational study     China Health and Retirement Longitudinal Study (CHARLS-2018) The sample of this study includes older people who have reached the statutory retirement age in China (i.e.,>60 years for males and>55 years for females).    **Level of intervention**  Government level (local or national)    **Delivery setting**  Structural and systems (e.g. law, tax, social security) | **Structural and system interventions**  Employment-based social health insurance (UEBMI    **Level of intervention**  Government level (local or national)    **Key intervention strategies and approaches used**       Greater health insurance coverage impacts on treatment for chronic conditions and early retirement due to chronic ill health. Health insurance can lessen the burden of medical expense on older workers with chronic conditions and prompt them to seek medical treatments in time and thus reduce the incidence of deterioration | **Employment related outcomes**  Exit from labour market  Work capacity    **Findings**  Positive  Findings summary    employment-based social health insurance (UEBMI) in China may help maintain health-related working capacity of retirement-aged people and reduce their willingness to participate in late-life careers. Their willingness to extend working life may be driven by economic pressure of higher out-of-pocket medical expenditures. By providing a supportive set of financial and physical conditions, the health insurance scheme may play an important role in reducing the conflict encountered by chronically ill retirement-aged workers between persistent treatment and rehabilitation and demands of work. Chronically ill older adults who are insured by the UEBMI may be physically more able to work and are more likely to enter the labour force market after the retirement age. |

Table 3 Primary studies of interventions for on older workers: work-focused interventions

| Short title | Study characteristics | Intervention characteristics | findings |
| --- | --- | --- | --- |
| Midtsundstad (2016) | **Country**  Norway    **Population**  Older workers (in employment)    **Type of study design**  Observational study    **Level of intervention**  Workplace and employer level    **Delivery setting**  Workplace    **Comparison**  No intervention | **Structural and system interventions**   Work adjustments    **Level of intervention**  Workplace and employer level    **Key intervention strategies and approaches used**         interventions to facilitate work among employees with health problems or reduced work capacity | **Receipt of benefits**  Disability benefit    **Findings**  Positive  Findings summary    Interventions to facilitate work among employees with health problems or reduced work capacity have reduced disability rates among employees aged 50-61. This suggests that companies’ preventive interventions are an effective means to retain older workers with deteriorating health. |
| Neupane (2023) | **Country**  Finland    **Population**  Older workers (in employment)    **Type of study design**  Experimental study: randomised controlled trial or Quasi RCT    **Level of intervention**  Workplace and employer level    **Delivery setting**  Workplace    **Comparison**  No intervention | **Structural and system interventions**   Work adjustments    **Level of intervention**  Workplace and employer level    **Key intervention strategies and approaches used**       Addressing the associated work-related physical factors. The workers in senior program were allocated less physically demanding tasks and offered the option to participate in rehabilitation and training programmes if needed | **Employment related outcomes**  Exit from labour market  Work ability    **Receipt of benefits**  Disability benefit    **Findings**  Positive  Findings summary    A workplace senior program intervention prolonged work life and had positive effect on reducing disability pension among older industrial workers. |
| van der Meer (2016) | **Country**  Denmark    **Population**  Older workers (in employment)    **Type of study design**  Observational study    **Level of intervention**  Workplace and employer level    **Delivery setting**  Workplace    **Comparison**  No comparison | **Structural and system interventions**   Work adjustments    Working Hours and Night Work    **Level of intervention**  Workplace and employer level    **Key intervention strategies and approaches used**       whether lower work ability and work engagement predict the use of company policies on reduced working hours | **Employment related outcomes**  Work ability  Work engagement    **Findings**  Mixed  Findings summary    Low work ability precedes the use of some company policies aiming to support sustainable employability of older workers. Further research is needed to explore whether company policies result in a (longstanding) improvement, or reduced deterioration, of older workers' employability. The mixed findings with respect to the consequences of using company policies stresses the importance of tailoring measures to the individual, and continuous communication between the employee and his/her manager about the fit between the demands of the job and the individual worker |

Table 4. Primary studies of interventions for on older workers: Person centred support for employment/ labour market

| Short title | Study characteristics | Intervention characteristics | Findings |
| --- | --- | --- | --- |
| Brown 2018 | **Country** United Kingdom  **Population** Older adults who not in employment or not seeking employment (economic inactivity)  **Type of study design** Observational study  **Level of intervention** Individual level  **Delivery setting** Government facilities  **Comparison** matched group | **Intervention Type** Employment/Labour market focus intervention  **Employment/Labour market focus intervention** The Work Programme (WP) UK Government’s flagship welfare-to-work initiative to help those more detached from the labour market to enter employment and reduce the time people spent on benefits | **Employment related outcomes** Job start  **Receipt of benefits** Job seekers' allowance Employment and support allowance  **Findings** Mixed Findings summary [There is a strong negative relationship between age and the predicted probability of having a job start during the 2-year engagement with the programme for both JSA and ESA clients. JSA clients were most likely to RTW in the first 3 months, while for ESA clients the predicted probability of having a first job start was fairly constant over the 2 years. Age plays an important role in influencing RTW; however, important potentially modifiable factors include the length of unemployment, the management of multimorbidity and the individual's perception of the likelihood of job start. |
| Human Resources and Skills Development Canada (2010) | **Country**  Canada    **Population**  Older adults who not in employment or not seeking employment (economic inactivity)    **Type of study design**  Quasi experimental methods    **Level of intervention**  Individual level    **Delivery setting**  Community settings    Targeted at vulnerable communities, e.g. with high unemployment due to industry closure    **Comparison**  No intervention | **Employment/Labour market focus intervention**  Targeted Initiative for Older Workers (TIOW).    **Level of intervention**  Individual level    **Key intervention strategies and approaches used**       Employment assistance activities which include (but are not limited to) activities such as résumé writing, interview techniques, counselling and job-finding clubs. Assessment, peer mentoring, basic skills upgrading, skills training,  wage subsidies to access available employment, preparation for self-employment,  work experience on community projects, direct marketing to employers, and post-project follow-up mentoring and support | **Knowledge, attitudes, awareness, satisfaction**  Beliefs in own skills and employability    **Findings**  Positive  Findings summary   Further, the labour market outcomes of participants surveyed were positive, with 75% having found employment during or after their participation in TIOW, and 80% indicating they felt more employable because of the project activities |
| Wang (2023) | **Country**  China    **Population**  Older adults (General population or no information about employment status)    **Type of study design**  Observational study    **Level of intervention**  Individual level    **Delivery setting**  Workplace    **Comparison**  No comparison | **Employment/Labour market focus intervention**  Bridge Employment    **Level of intervention**  Individual level    **Key intervention strategies and approaches used**       Job crafting- testing the mediating role of psychological contract type in the effect of older workers’ job crafting strategies on intention to bridge employment. In Study 2, based on a two-by-two (high emotional support/baseline × high/low compensation support) | **Knowledge, attitudes, awareness, satisfaction**  Intentions    **Findings**  Positive  Findings summary   Accommodative crafting, developmental crafting, utilization crafting are all positively related with bridge employment intentions. the emotional support provided by the organization satisfied the contractual terms of relationship-oriented older workers and thus retained them but did not work for transaction-oriented older workers. The compensation support provided by the organization satisfied the transaction-oriented older workers and thus retained them, in contrast, was repelled by relationship-oriented older workers. |

Table 5: Primary studies of interventions for on older workers: support for education and skills

| Short title | Study characteristics | Intervention characteristics | Findings |
| --- | --- | --- | --- |
| Choi (2012) | **Country**  Korea    **Population**  Older adults who not in employment or not seeking employment (economic inactivity)    The sample included those who lost their jobs in 2007 and lost their employment insurance eligibility for involuntary reasons, such as firm closure or relocation, bankruptcy, worsening business conditions, managerial needs and firm owner’s personalreasons    **Type of study design**  Observational study    **Level of intervention**  Individual level    **Delivery setting**  Not stated    **Comparison**  matched group | **Education skill training focus intervention**  job training for occupational change for displaced workers’ (JTOCDW).    **Level of intervention**  Individual level    **Key intervention strategies and approaches used**       provides subsidies for training expenses, including training fees/tuition, for those who want to receive job training upon their separation from a workplace covered by employment insurance.: Up to 12 months | **Employment related outcomes**  Employment rate    **Findings**  Positive  Findings summary   Effect was driven mainly by ‘lock-in effects’, and a positive effect in the long run. The nearest-neighbour and regression-adjusted matching estimates suggest that training increased the employment probability by approximately 4 to 8 percentage points within a year and a half after the onset of unemployment |
| Gordo (2011) | **Country**  Germany    **Population**  Older adults who not in employment or not seeking employment (economic inactivity)    in receipt of unemployment benefits    **Type of study design**  Observational study    **Level of intervention**  Individual level    **Delivery setting**  Workplace  Classroom    **Comparison**  matched group | **Education skill training focus intervention**  Training programme    **Level of intervention**  Individual level    **Key intervention strategies and approaches used**       Short-term training participation can help to improve speciﬁc knowledge (e.g., language and software courses). It can also raise job search effectiveness, with courses on writing applications and on job interviews | **Employment related outcomes**  Employment rate    **Receipt of benefits**  Unemployment benefit    **Findings**  Mixed Classroom training: For men in East Germany and women after about 3 months, they are usually approximately one percentage point. Yet they are mostly insigniﬁcant at a 5% level with the exception of the effects in the ﬁrst 3 to 8 months for East German women. For West German men, they are somewhat higher, are well-determined (i.e., statistically signiﬁcant at least at a 10% signiﬁcance level), and reach a level of more than two percentage points 12 months after the start of training. In firm training: the treatment effects for in-ﬁrm and for East and West Germans are clearly much higher than the classroom training effects. |

Table 6: Primary studies of interventions for on older workers: health focused interventions

| Short title | Study characteristics | Intervention characteristics | Findings |
| --- | --- | --- | --- |
| Chopp-Hurley (2017) | **Country**  Canada    **Population**  **Older workers (in employment)**  Older university employees with knee and/or hip osteoarthritis.    **Type of study design**  Experimental study: randomised controlled trial or Quasi RCT   **Level of intervention**  Individual level    **Delivery setting**  Workplace    **Comparison**  No intervention | **Health focus intervention**  Workplace exercise    **Level of intervention**  Individual level | **Employment related outcomes**  Work ability    **Health related outcomes**  Depression  Function  Pain    **Findings**  **Positive**  Findings summary  Significant improvements in work ability (P<0.049) and patient-reported outcomes (pain, function, depressive symptoms) existed in the exercise group while no improvements were demonstrated in the no exercise group. |
| Koolhaas (2015) | **Country**  Netherlands    **Population**  Older workers (in employment)    **Type of study design**  Quasi experimental methods    **Level of intervention**  Individual level    **Delivery setting**  Workplace    **Comparison**  No intervention | **Health focus intervention**  ‘Staying healthy at work’    **Level of intervention**  Individual level    **Key intervention strategies and approaches used**       ‘staying healthy at work, was developed’ on the basis of the two general, partially independent components of the cognitive behavioural approach ‘problem orientation’ and ‘problem-solving style’ .  The intervention’s cognitive-behavioural approach could help workers point out a variety of potentially effective solutions for a particular health related problem which affected their sustainable employability... It contributes to the workers’ belief that they are capable of solving work-related problems and attaining goals, and thereby strengthens their self-efficacy in remaining in work. | **Employment related outcomes**  Productivity  Work ability  Work engagement    **Health related outcomes**  Vitality  Fatigue    **Knowledge, attitudes, awareness, satisfaction**  Work attitude  Self efficacy    **Findings**  No effect  Findings summary  We assume that the intervention’s lack of impact on the primary outcome measures must be explained by programme failure.  At the dose delivered level, the short duration of the training of the supervisors could explain the lack of effectiveness of the intervention on the primary outcome measures. The supervisors’ knowledge and basic skills in communication was low and, during the training, a lot of time was spent on these basic skills instead of on the problem-solving approach. At the workers’ level (dose received), the extent to which the workers actively engaged in the third stage of the intervention was lower than expected |
| Siukola (2011) | **Country**  Finland    **Population**  Older workers (in employment)    **Type of study design**  Quasi experimental methods    **Level of intervention**  Workplace and employer level    **Delivery setting**  Workplace    **Comparison**  No intervention | **Health focus intervention**  Multicomponent intervention    **Level of intervention**  Workplace and employer level    **Key intervention strategies and approaches used**       The participating employees had an appraisal with their supervisor about their work demands, work ability, opportunities to alter the content of work, need for rehabilitation or education.  Participating employees were offered various options on wage security (wage not reduced even if work changed to be less demanding), exemption from night work or three-shift work, reduction of work task rotation, option to exchange bonus in salary for extra time off, option for free or subsidized physical therapy following referral by the company physician | **Health related outcomes**  Sickness absence days    **Findings**  Mixed  Findings summary  findings suggest that intervention might affect the sickness absence profile of older employees.  Reducing long spells at the expense of increasing short spells may not seem beneficial with respect to immediate productivity, but it may reduce the risks and costs of early retirement |
| Strijk 2013 | **Country**  Netherlands    **Population**  Older workers (in employment)    **Type of study design**  Experimental study: randomised controlled trial or Quasi RCT    **Level of intervention**  Individual level    **Delivery setting**  Workplace    **Comparison**  No comparison | **Health focus intervention**  Vital@Work    **Level of intervention**  Individual level    **Key intervention strategies and approaches used**       Vital@Work intervention were that older workers would improve their: (i) mental factors of vitality by relaxation exercises (ie, guided yoga sessions); (ii) physical factors of vitality by vigorous intensity physical activities (i.e., guided and unsupervised workout sessions); and (iii) fruit intake (i.e., free fruit at guided sessions) by goal setting, feedback, and problem-solving strategies. | **Employment related outcomes**  Productivity  Work engagement    **Health related outcomes**  Sickness absence days  Vitality    **Findings**  Mixed  Findings summary    No Intervention effects were observed for vitality, work engagement, productivity, or sick leave. However, the results of the present study showed that high yoga compliers significantly increased their work-related and general vitality |
